# Supplementary material for: Assessing the effectiveness of an electrical stunning and chilling protocol for the slaughter of Atlantic mackerel (Scomber scombrus)
Source: PLoS One. 2019 Sep 4;14(9):e0222122. doi: 10.1371/journal.pone.0222122 (PMC6726217; doi:10.1371/journal.pone.0222122)
Supplement: S1 Dataset — Consciousness indicator scores and consciousness index results for mackerel used in the experiment. (CSV) [file pone.0222122.s001.csv]

Fish_No	Assessment_time	VOR	Operculum	Tactile	Index
100	-1	2	2	2	1
200	-1	2	2	2	1
300	-1	2	2	2	1
400	-1	2	2	2	1
500	-1	2	2	2	1
X	0	NA	NA	NA	NA
1	1	0	0	0	0
2	1	0	0	0	0
3	1	0	0	0	0
4	1	0	0	0	0
5	1	0	0	0	0
6	1	0	0	0	0
7	1	0	0	0	0
8	1	0	0	0	0
9	1	0	0	0	0
10	1	0	0	0	0
11	1	0	0	0	0
12	1	0	0	0	0
13	1	0	0	0	0
14	1	0	0	0	0
15	1	0	0	0	0
16	1	0	0	0	0
17	1	0	0	0	0
18	1	0	0	0	0
19	1	0	0	0	0
20	1	2	0	0	0.333333333
21	1	0	0	2	0.333333333
22	1	0	0	0	0
23	1	0	0	0	0
24	1	0	0	0	0
25	1	0	0	0	0
1	2	0	0	0	0
2	2	0	0	2	0.333333333
3	2	0	0	0	0
4	2	0	0	0	0
5	2	0	0	2	0.333333333
6	2	0	0	0	0
7	2	0	0	0	0
9	2	0	0	0	0
10	2	0	0	0	0
11	2	0	0	0	0
13	2	0	0	0	0
14	2	0	0	0	0
15	2	0	0	0	0
16	2	0	0	0	0
17	2	0	0	0	0
18	2	0	0	2	0.333333333
19	2	0	0	0	0
20	2	2	0	0	0.333333333
21	2	0	0	0	0
22	2	0	0	0	0
23	2	0	0	0	0
24	2	0	0	0	0
25	2	0	0	0	0
1	3	0	0	0	0
2	3	0	0	0	0
3	3	0	0	0	0
4	3	0	0	0	0
5	3	0	0	0	0
6	3	0	0	0	0
7	3	0	0	0	0
8	3	0	0	0	0
9	3	0	0	0	0
10	3	0	0	0	0
11	3	0	0	0	0
13	3	0	0	0	0
14	3	0	0	0	0
15	3	0	0	0	0
16	3	0	0	0	0
17	3	0	0	0	0
18	3	0	0	0	0
19	3	2	0	0	0.333333333
20	3	0	0	0	0
21	3	0	0	0	0
22	3	0	0	0	0
23	3	0	0	0	0
24	3	0	0	0	0
25	3	0	0	0	0
1	4	0	0	0	0
2	4	0	0	0	0
3	4	0	0	0	0
4	4	0	0	0	0
5	4	0	0	0	0
6	4	0	0	0	0
7	4	0	2	0	0.333333333
8	4	0	0	0	0
9	4	0	0	0	0
10	4	0	0	0	0
12	4	0	0	0	0
13	4	0	0	0	0
14	4	0	0	0	0
15	4	0	0	0	0
16	4	1	0	0	0.166666667
17	4	0	2	0	0.333333333
18	4	0	0	0	0
19	4	0	0	0	0
20	4	0	0	0	0
21	4	0	0	0	0
22	4	0	0	0	0
23	4	0	0	0	0
24	4	0	0	0	0
25	4	0	0	0	0
1	5	0	0	0	0
2	5	0	0	0	0
3	5	0	0	0	0
4	5	0	0	0	0
5	5	0	0	0	0
6	5	0	0	0	0
7	5	0	0	0	0
8	5	0	0	0	0
9	5	0	0	0	0
10	5	0	0	0	0
11	5	0	0	0	0
12	5	0	0	0	0
13	5	0	0	0	0
14	5	0	0	0	0
15	5	0	0	0	0
16	5	0	0	0	0
17	5	1	2	0	0.5
18	5	0	0	0	0
19	5	0	0	0	0
20	5	0	0	0	0
21	5	0	0	0	0
22	5	0	0	0	0
23	5	0	0	0	0
24	5	0	0	0	0
25	5	0	0	0	0
1	6	0	0	0	0
2	6	0	0	0	0
3	6	0	0	0	0
4	6	0	0	0	0
5	6	0	0	0	0
6	6	0	0	0	0
7	6	0	0	0	0
8	6	0	0	0	0
9	6	0	0	0	0
10	6	0	0	0	0
12	6	0	0	0	0
13	6	0	0	0	0
14	6	0	0	0	0
15	6	0	0	0	0
16	6	0	0	0	0
17	6	0	2	0	0.333333333
18	6	0	0	0	0
19	6	0	0	0	0
20	6	0	0	0	0
21	6	0	0	0	0
22	6	0	0	0	0
23	6	0	0	0	0
24	6	0	0	0	0
25	6	0	0	0	0
1	15	0	0	0	0
2	10	0	0	0	0
17	7	0	0	0	0
17	10	0	0	0	0
18	9	0	0	0	0
18	10	0	0	0	0
